# Supplementary material for: Economical 550 V energy harvesting from plastic and electronic waste using human motions
Source: Royal Society of Chemistry journal article supplement (doi:10.1039/d4ta07070d), 2025-01-01

# **Movie S1:** Demonstration of signal response of e-Cu@WPP-TENG under different mechanical inputs of human hand pressing.

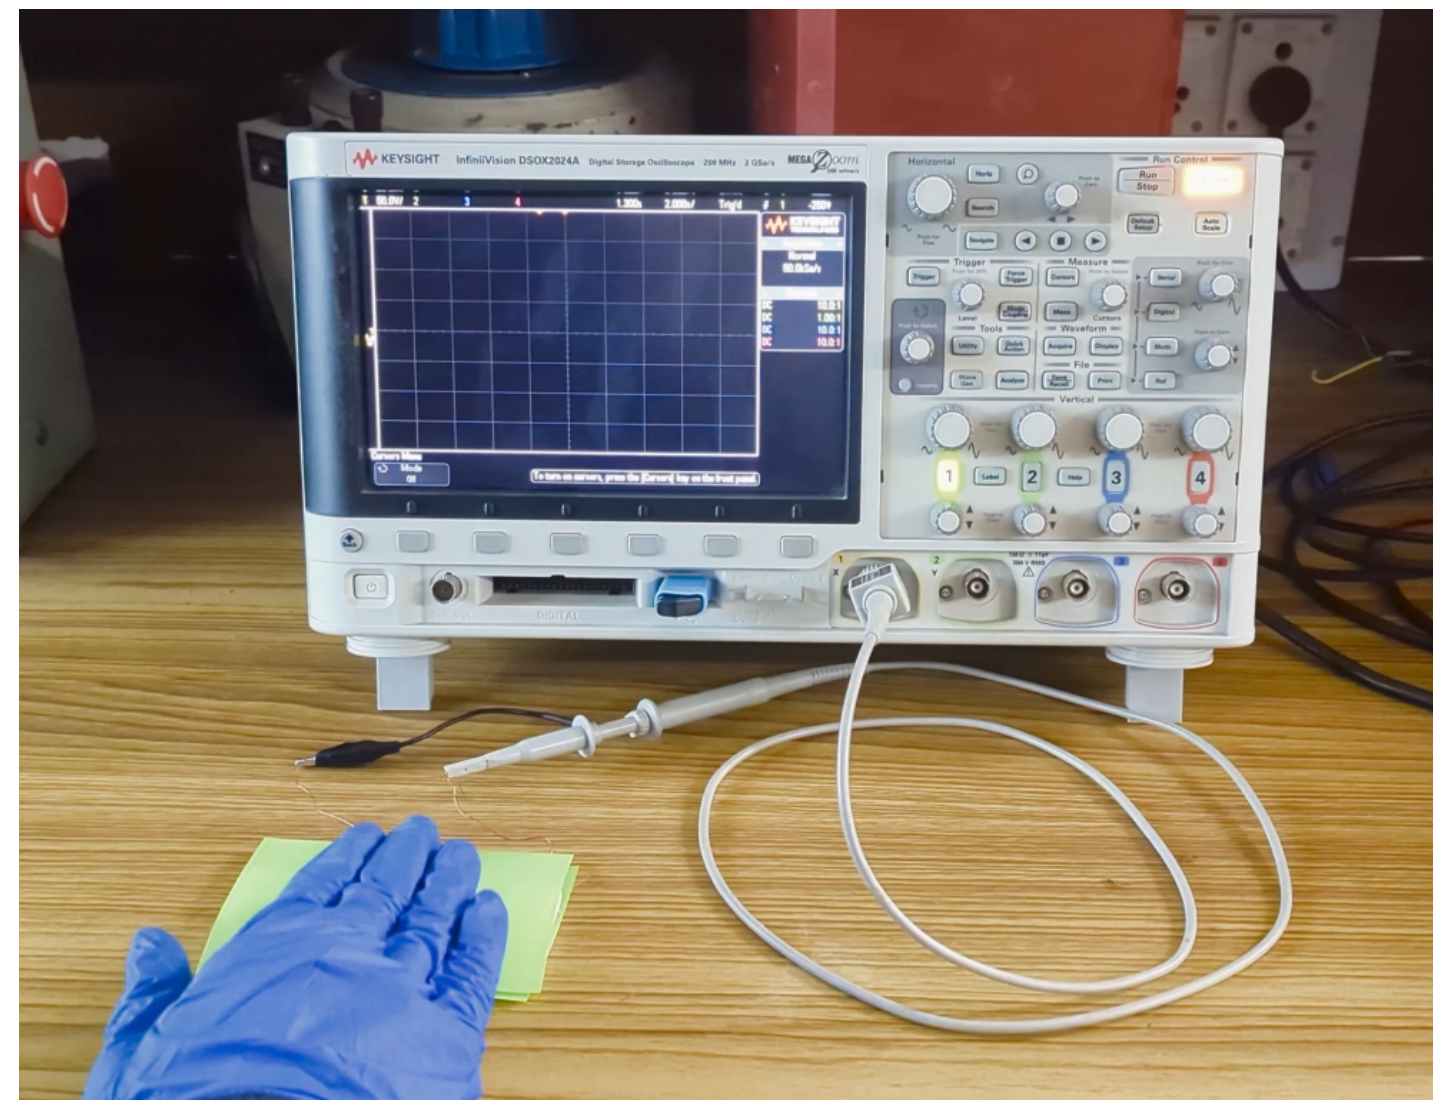

**Movie S2:** Real time multimedia demonstration of charging the 1 micro F capacitor by the e-Cu@WPP-TENG under hand tapping.

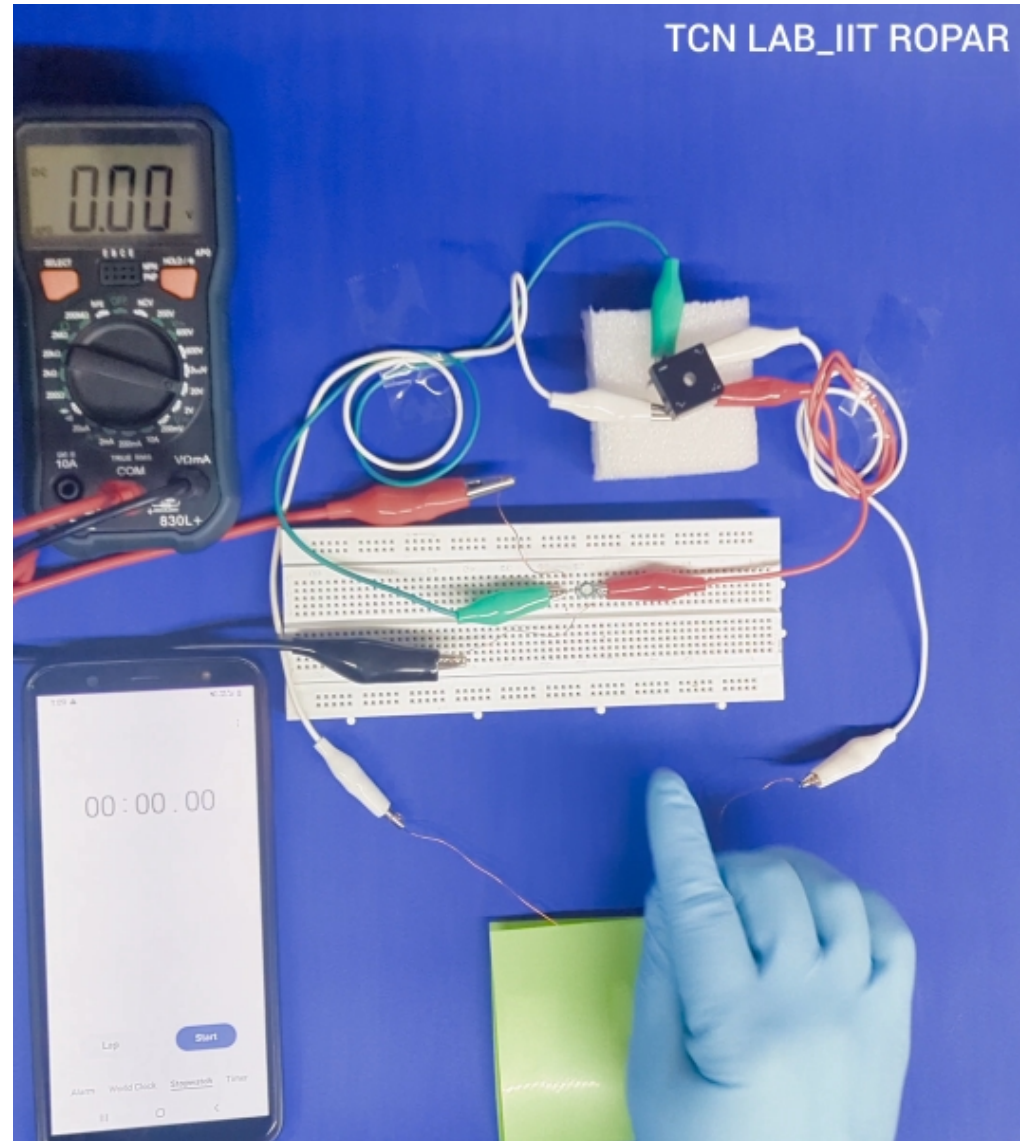

**Movie S3:** Demonstration of calculator powered by Triboelectric nanogenerator (e-Cu@WPP-TENG) under mechanical motions provided by hand pressing.

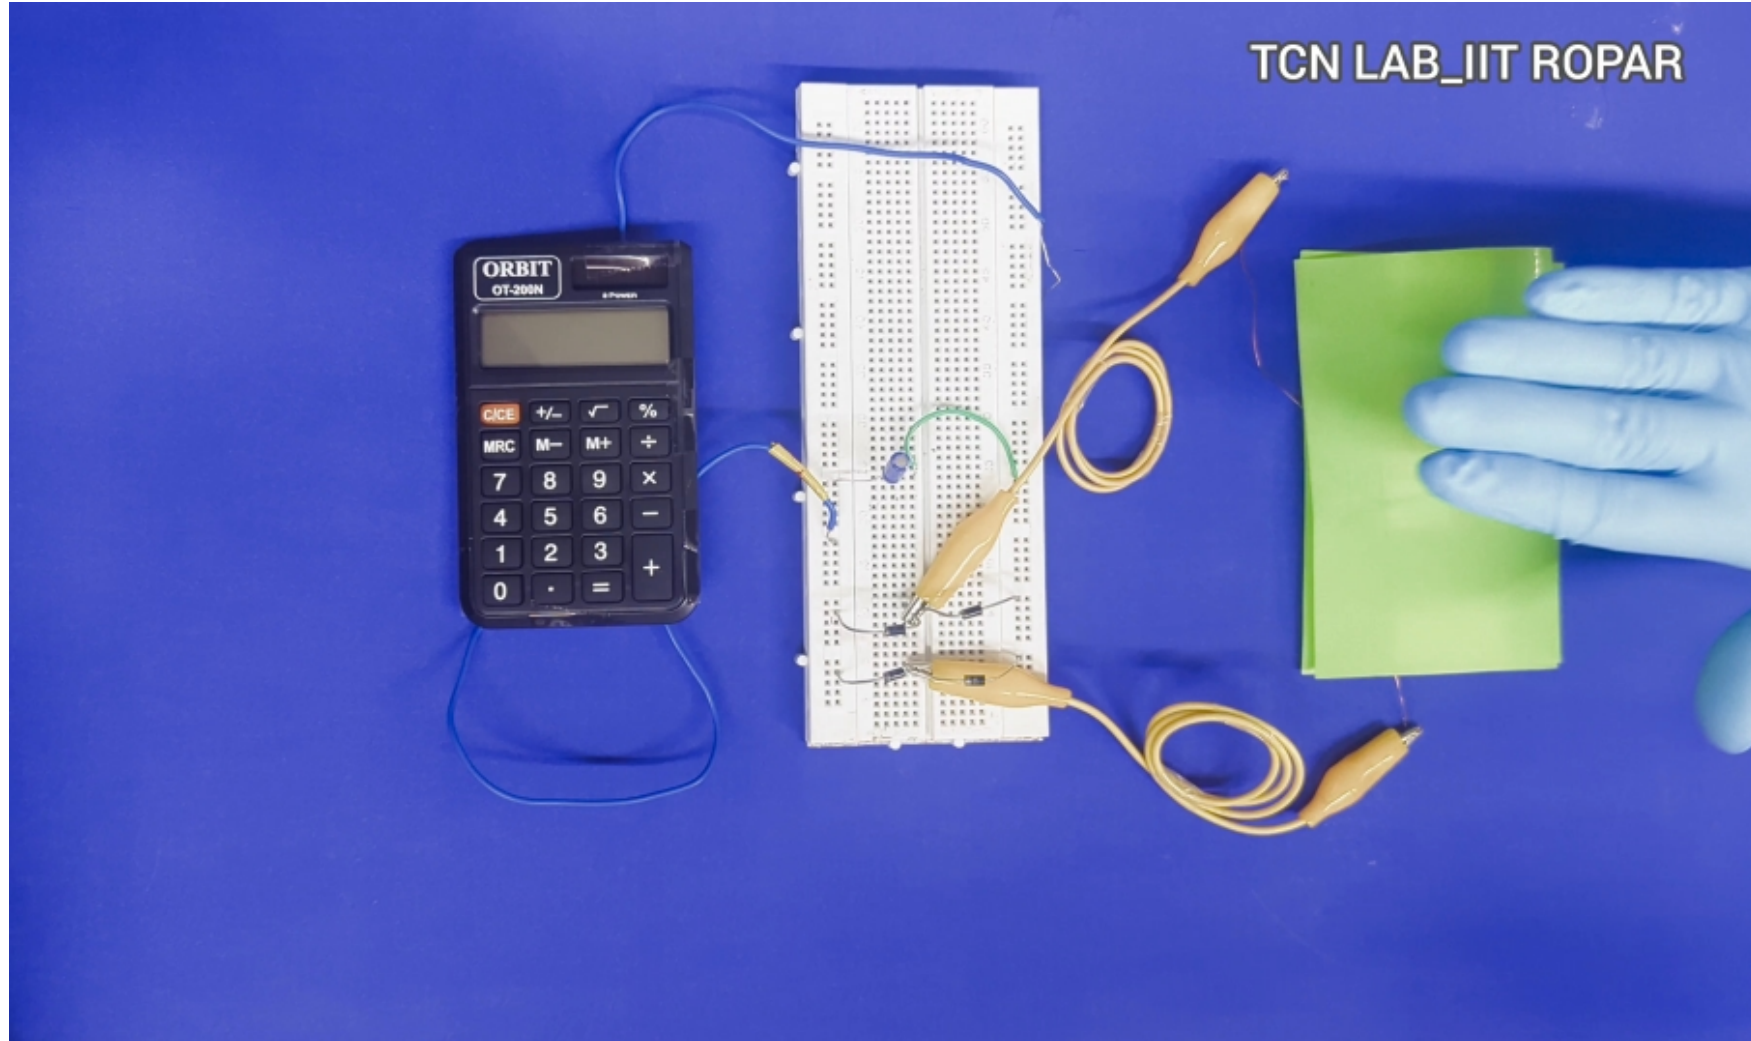

Supplement: d4ta07070d8.pdf [file d4ta07070d8.pdf]
