# Supplementary material for: Economical 550 V energy harvesting from plastic and electronic waste using human motions
Source: Royal Society of Chemistry journal article supplement (doi:10.1039/d4ta07070d), 2025-01-01

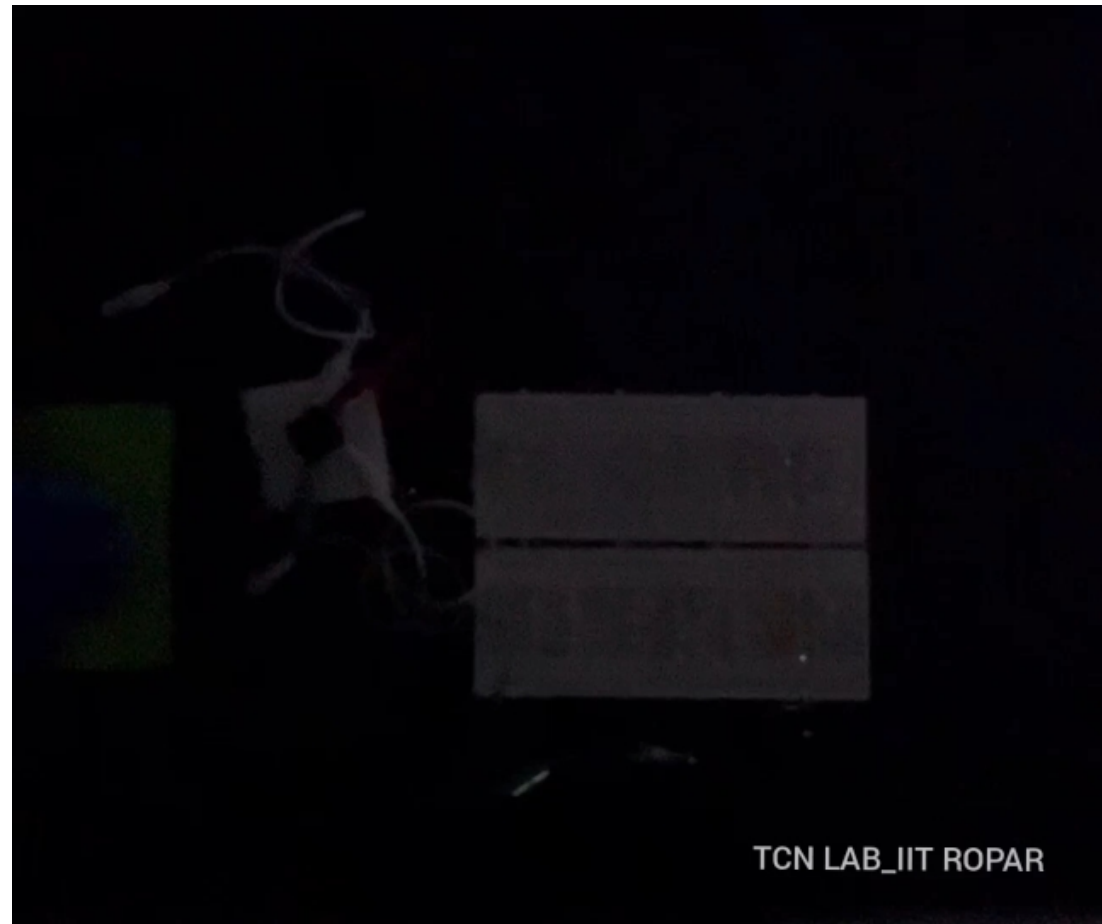

**Movie S4:** Demonstration of powering LED panel (96 LEDs) for sign board by the human hand tapping the e-Cu@WPP-TENG

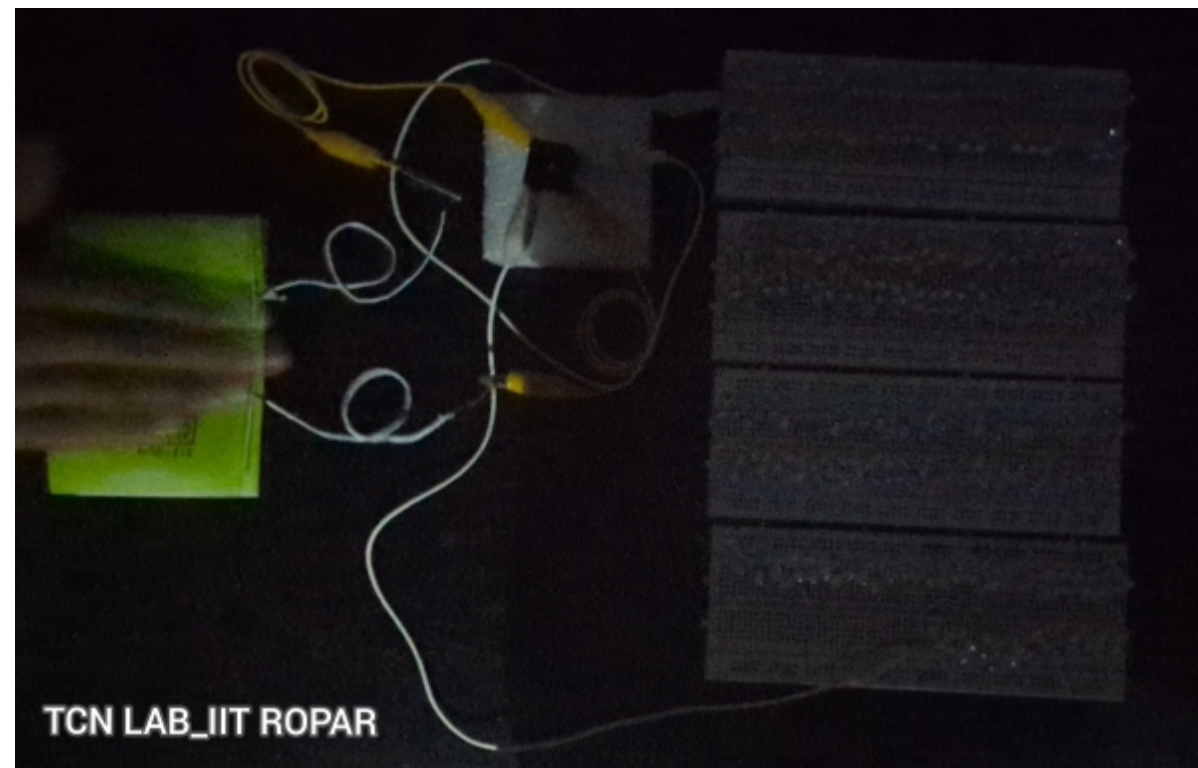

**Movie S5:** Demonstration of powering 472 LEDs simultaneously by hand pressing the e-Cu@WPP-TENG.

**Movie S6:** Demonstration of practical use case scenario of e-Cu@WPP-TENG to power the advertisement boards of buildings/hotels/offices/labs by the periodic movements of load (human foot in this case) over the e-Cu@WPP-TENG.

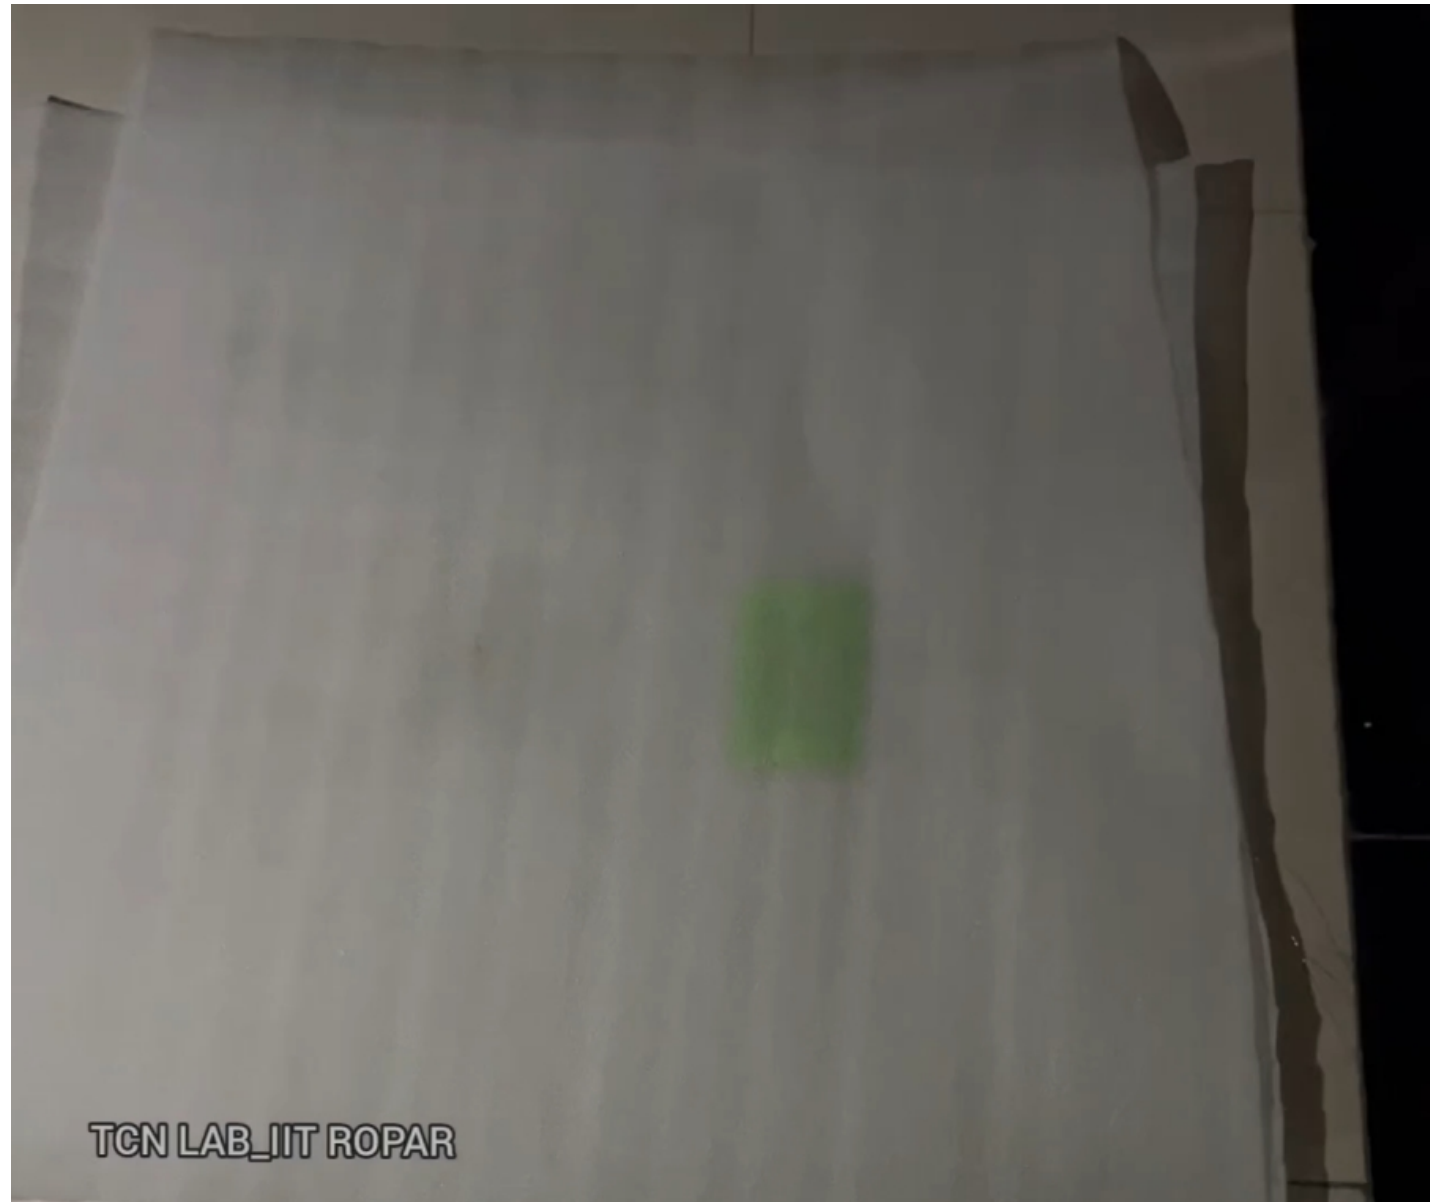

Supplement: d4ta07070d9.pdf [file d4ta07070d9.pdf]
